# Supplementary material
Source: PubMed Central journal article supplement (PMC9524465)
Supplement: NIHMS1774637-supplement-SI.pdf [file NIHMS1774637-supplement-SI.pdf]

# Supporting Information

## De Novo Design of a Self-Assembled Artificial Copper Peptide (ArCuP) that Activates and Reduces Peroxide

Suchitra Mitra,<sup>†,‡</sup> Divyansh Prakash,<sup>†,‡</sup> Khashayar Rajabimoghadam,<sup>‡</sup> Zdzislaw Wawrzak,<sup>§</sup> Pallavi Prasad,<sup>†</sup> Tong Wu,<sup>‡</sup> Sandeep K. Misra,<sup>||</sup> Joshua S. Sharp,<sup>||,†</sup> Isaac Garcia-Bosch,<sup>‡</sup> Saumen Chakraborty<sup>\*,†</sup>

<sup>†</sup>Department of Chemistry and Biochemistry, University of Mississippi, University, MS 38677, USA

<sup>‡</sup>Department of Chemistry, Southern Methodist University, Dallas, TX 75275, USA

<sup>§</sup>Argonne National Laboratory, 9700 S. Cass Ave, Argonne, IL 60439, USA

<sup>||</sup>Department of Biomolecular Sciences, University of Mississippi, University, MS 38677, USA

Corresponding Author:

[\\*saumenc@olemiss.edu](mailto:*saumenc@olemiss.edu)

Author Contributions:

<sup>#</sup>S.M. and D.P. contributed equally.

**Table S1.** Results from  $\text{Bcs}^{2-}$  titration to  $[\text{3SCC-Cu(I9H)}_3]^+$  in 100 mM MOPS pH 7.5.

| $A_{483\text{nm}}$ | $\text{Cu(Bcs)}_2^{2-}$<br>( $\mu\text{M}$ ) | $\text{Cu(Pep)}_3^{2+}$<br>( $\mu\text{M}$ ) | $(\text{Pep})_3$<br>( $\mu\text{M}$ ) | $\theta =$<br>$\text{Cu(Pep)}_3^{2+} /$<br>$(\text{Pep})_3$ | $K_d$ (M)             |
|--------------------|----------------------------------------------|----------------------------------------------|---------------------------------------|-------------------------------------------------------------|-----------------------|
| 0.005              | 0                                            | 15                                           | 30                                    | 0.5                                                         | --                    |
| 0.029              | 2.3                                          | 12.7                                         | 30                                    | 0.43                                                        | $5.9 \times 10^{-17}$ |
| 0.061              | 4.6                                          | 10.4                                         | 30                                    | 0.35                                                        | $2.4 \times 10^{-16}$ |
| 0.084              | 6.4                                          | 8.6                                          | 30                                    | 0.29                                                        | $6.1 \times 10^{-16}$ |
| 0.111              | 8.4                                          | 6.6                                          | 30                                    | 0.22                                                        | $1.8 \times 10^{-15}$ |
| 0.134              | 10.1                                         | 4.9                                          | 30                                    | 0.16                                                        | $5.1 \times 10^{-15}$ |
| 0.150              | 11.3                                         | 3.7                                          | 30                                    | 0.12                                                        | $1.2 \times 10^{-14}$ |
| 0.167              | 12.6                                         | 2.4                                          | 30                                    | 0.08                                                        | $3.7 \times 10^{-14}$ |
| 0.173              | 13.1                                         | 1.9                                          | 30                                    | 0.06                                                        | $6.3 \times 10^{-14}$ |

Total concentration of  $[\text{3SCC-(I9H)}_3] = 30 \mu\text{M}$ ;  $\text{Cu(I)} = 15 \mu\text{M}$ ;  $[\text{Bcs}^{2-}] = 33 \mu\text{M}$ .

**Table S2.** Results of kinetic UV-vis experiments.

| pH  | $\epsilon_{330}$<br>( $M^{-1}cm^{-1}$ )     | $\epsilon_{387}$<br>( $M^{-1}cm^{-1}$ )     | Initial rate<br>@ $\lambda_{330nm}$ / $s^{-1}$    | Initial rate<br>@ $\lambda_{387nm}$ / $s^{-1}$    | $\epsilon_{350}$<br>( $M^{-1}cm^{-1}$ ) <sup>a</sup> | $\epsilon_{440}$<br>( $M^{-1}cm^{-1}$ ) <sup>b</sup> | Initial rate<br>@ $\lambda_{350nm}$ / $s^{-1c}$   |
|-----|---------------------------------------------|---------------------------------------------|---------------------------------------------------|---------------------------------------------------|------------------------------------------------------|------------------------------------------------------|---------------------------------------------------|
| 5.5 | $1.8 \times 10^3$                           | $8.1 \times 10^2$                           | $3.4 \times 10^{-5}$                              | $3.6 \times 10^{-6}$                              | $3.08 \times 10^3$                                   | $0.09 \times 10^2$                                   | $1.74 \times 10^{-4}$                             |
| 6.5 | $7.2 \times 10^3$                           | $2 \times 10^3$                             | $1.1 \times 10^{-4}$                              | $3.8 \times 10^{-5}$                              | $10.4 \times 10^3$                                   | $2.8 \times 10^2$                                    | $1.6 \times 10^{-4}$                              |
| 7.5 | $6.4 \times 10^3$<br>( $11.9 \times 10^3$ ) | $1.4 \times 10^3$<br>( $3.68 \times 10^3$ ) | $3.2 \times 10^{-4}$<br>( $6.83 \times 10^{-4}$ ) | $7.3 \times 10^{-5}$<br>( $3.59 \times 10^{-6}$ ) | $11.9 \times 10^3$<br>( $8.57 \times 10^3$ )         | $5.63 \times 10^2$<br>( $0.6 \times 10^3$ )          | $7.2 \times 10^{-4}$<br>( $1.16 \times 10^{-3}$ ) |
| 8.5 | $5.5 \times 10^3$                           | $1.1 \times 10^3$                           | $2.4 \times 10^{-4}$                              | $2.3 \times 10^{-5}$                              | $8.4 \times 10^3$                                    | $0.6 \times 10^2$                                    | $5.32 \times 10^{-4}$                             |
| 9.5 | $5.5 \times 10^3$                           | $1.3 \times 10^3$                           | $2.2 \times 10^{-4}$                              | $5.8 \times 10^{-5}$                              | $8.89 \times 10^3$                                   | $1.2 \times 10^2$                                    | $5.3 \times 10^{-5}$                              |

<sup>a,b,c</sup> in the presence of ascorbate, the values in parenthesis are for  $[3SCC-Cu(I9HW28Q)_3]^{2+}$ .

**Table S3.** Relevant spectroscopic parameters for the Trp28Gln mutant.

| Sample                                                                               | $\lambda_{\max}$ (nm)<br>( $\epsilon / \text{M}^{-1}\text{cm}^{-1}$ ) | $g_x, g_y$ | $g_z$ | $A_x, A_y$<br>(MHz) | $A_z$<br>(MHz) |
|--------------------------------------------------------------------------------------|-----------------------------------------------------------------------|------------|-------|---------------------|----------------|
| [3SCC-<br>Cu(I9HW28Q) <sub>3</sub> ] <sup>2+</sup>                                   | 590 (60)                                                              | 2.05       | 2.28  | 117                 | 525            |
| [3SCC-<br>Cu(I9HW28Q) <sub>3</sub> ] <sup>2+</sup><br>+H <sub>2</sub> O <sub>2</sub> | 330(9200)<br>387(2000)                                                | 2.06       | 2.28  | 84                  | 525            |
| [3SCC-<br>Cu(I9HW28Q) <sub>3</sub> ] <sup>+</sup><br>+H <sub>2</sub> O <sub>2</sub>  | 350 (7373)<br>440(690)                                                | 2.06       | 2.28  | 100                 | 507            |

**Table S4.** X-ray data collection and refinement statistics.

|                                       |                                                                                        |
|---------------------------------------|----------------------------------------------------------------------------------------|
| <b>Wavelength</b>                     | 0.9786                                                                                 |
| <b>Resolution range</b>               | 19.63 - 1.45 (1.502 - 1.45)                                                            |
| <b>Space group</b>                    | P 63                                                                                   |
| <b>Unit cell</b>                      | a = 39.26<br>b = 39.26<br>c = 83.63<br>$\alpha$ = 90<br>$\beta$ = 90<br>$\gamma$ = 120 |
| <b>Total reflections</b>              | 25414 (2203)                                                                           |
| <b>Unique reflections</b>             | 12796 (1181)                                                                           |
| <b>Multiplicity</b>                   | 2.0 (1.9)                                                                              |
| <b>Completeness (%)</b>               | 97.08 (81.29)                                                                          |
| <b>Mean I/sigma(I)</b>                | 10.32 (0.65)                                                                           |
| <b>Wilson B-factor</b>                | 23.10                                                                                  |
| <b>R-merge</b>                        | 0.01907 (1.49)                                                                         |
| <b>R-meas</b>                         | 0.02697 (2.108)                                                                        |
| <b>R-pim</b>                          | 0.01907 (1.49)                                                                         |
| <b>CC1/2</b>                          | 1 (0.384)                                                                              |
| <b>CC*</b>                            | 1 (0.745)                                                                              |
| <b>Reflections used in refinement</b> | 12795 (1043)                                                                           |
| <b>Reflections used for R-free</b>    | 555 (54)                                                                               |
| <b>R-work</b>                         | 0.2687 (0.4588)                                                                        |
| <b>R-free</b>                         | 0.2945 (0.4711)                                                                        |
| <b>CC(work)</b>                       | 0.948 (0.440)                                                                          |
| <b>CC(free)</b>                       | 0.941 (0.454)                                                                          |
| <b>Number of non-hydrogen atoms</b>   | 702                                                                                    |
| <b>macromolecules</b>                 | 675                                                                                    |
| <b>ligands</b>                        | 14                                                                                     |
| <b>solvent</b>                        | 13                                                                                     |
| <b>Protein residues</b>               | 95                                                                                     |
| <b>RMS(bonds)</b>                     | 0.009                                                                                  |
| <b>RMS(angles)</b>                    | 1.26                                                                                   |
| <b>Ramachandran favored (%)</b>       | 100.00                                                                                 |
| <b>Ramachandran allowed (%)</b>       | 0.00                                                                                   |
| <b>Ramachandran outliers (%)</b>      | 0.00                                                                                   |
| <b>Rotamer outliers (%)</b>           | 1.89                                                                                   |
| <b>Clashscore</b>                     | 0.72                                                                                   |
| <b>Average B-factor</b>               | 39.90                                                                                  |

Statistics for the highest-resolution shell are shown in parentheses. Table generated in Phenix.

The structure factors and coordinates are provided in the CIF files.

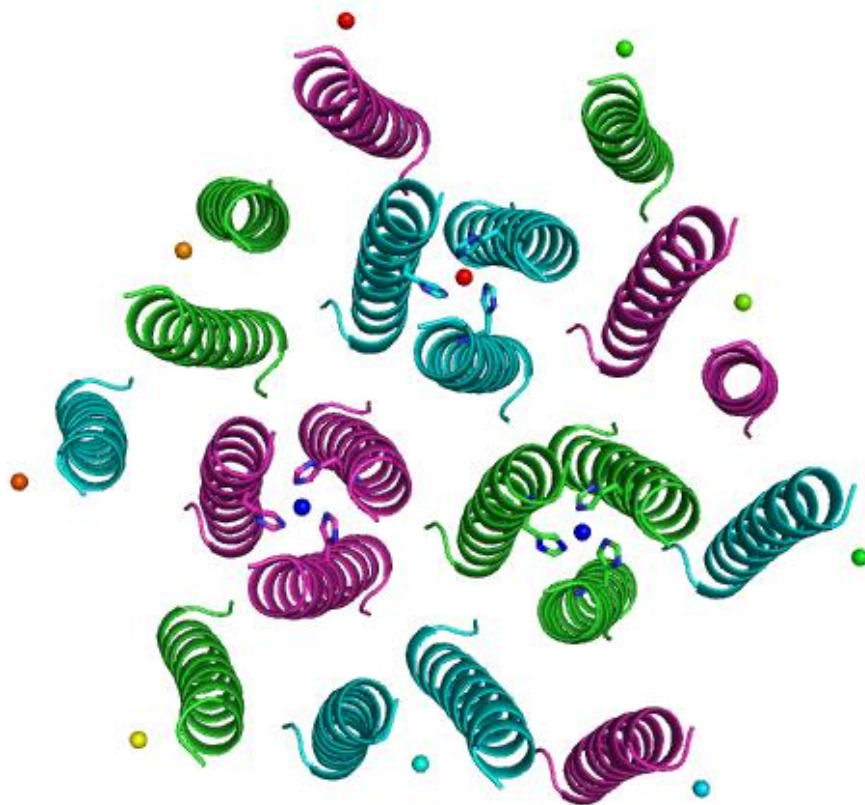

**Figure S1.** Overall assembly of the ArCuP showing the arrangement of helices. A<sub>3</sub> chains are in green, B<sub>3</sub> chains are in cyan and C<sub>3</sub> chains are in magenta.

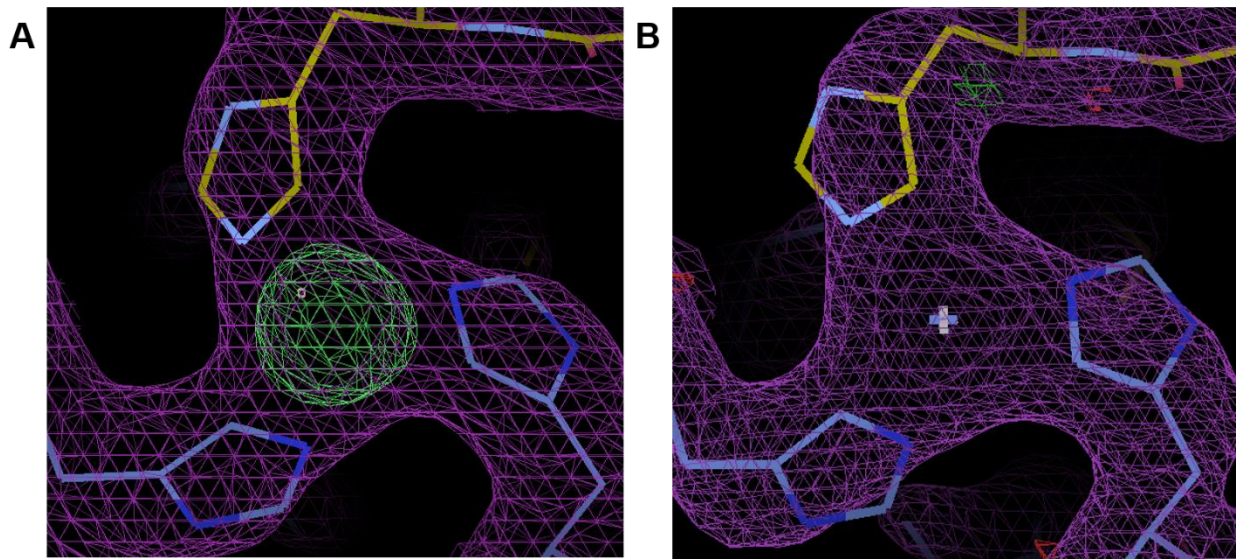

**Figure S2.** 2F<sub>o</sub>-F<sub>c</sub> (magenta) and F<sub>o</sub>-F<sub>c</sub> maps (green) before (A) and after adding Cu followed by refinement (B).

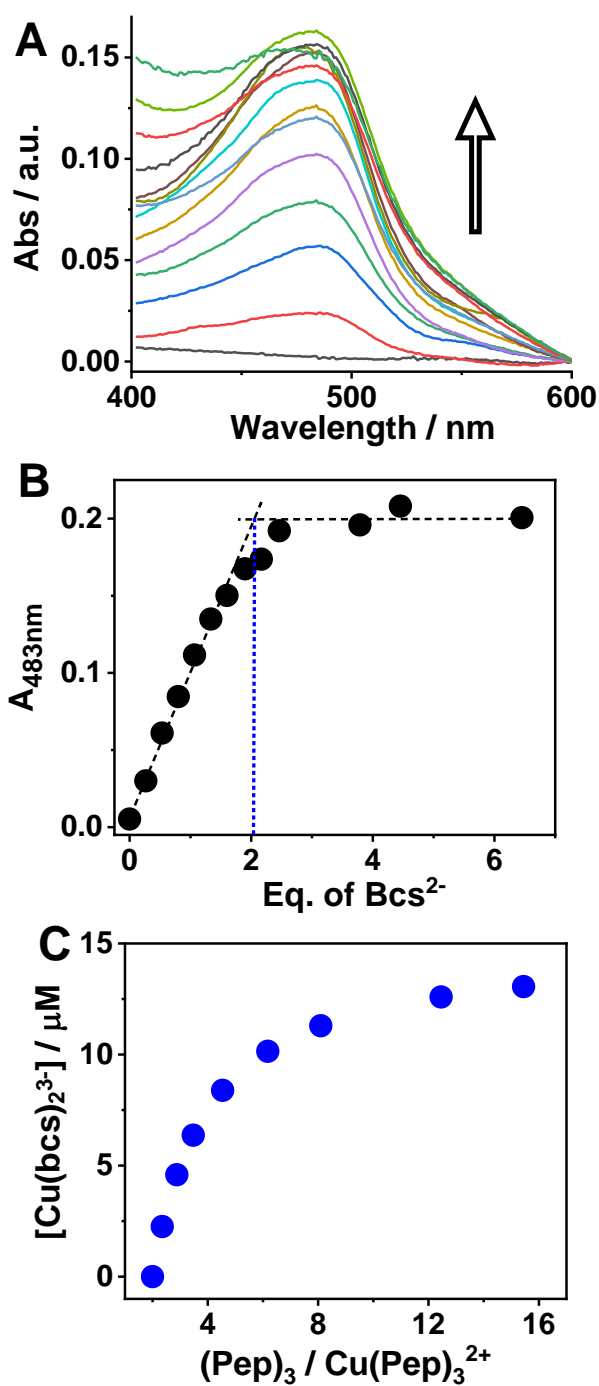

**Figure S3.** A) Spectra showing the formation of  $\text{Cu}(\text{Bcs})_2^{3-}$  during gradual addition of  $\text{Bcs}^{2-}$  to  $[\text{3SCC-Cu}(\text{I9H})_3]^+$  in 100 mM MOPS pH 7.5. B) Plot of  $A_{483}$  vs equivalents of  $\text{Bcs}^{2-}$  showing saturation at 2 equivalents of  $\text{Bcs}^{2-}$ . C) Plot of  $[\text{Cu}(\text{Bcs})_2^{3-}]$  vs  $1/\theta$  used to determine  $K_d^{\text{Cu(I)}}$ . Total  $[\text{3SCC}(\text{I9H})_3] = 30 \mu\text{M}$ ;  $\text{Cu}(\text{I}) = 15 \mu\text{M}$ ;  $[\text{Bcs}^{2-}] = 33 \mu\text{M}$ . 2-fold excess of free peptide trimer was kept to ensure no free  $\text{Cu}(\text{I})$  is present prior to  $\text{Bcs}^{2-}$  addition.



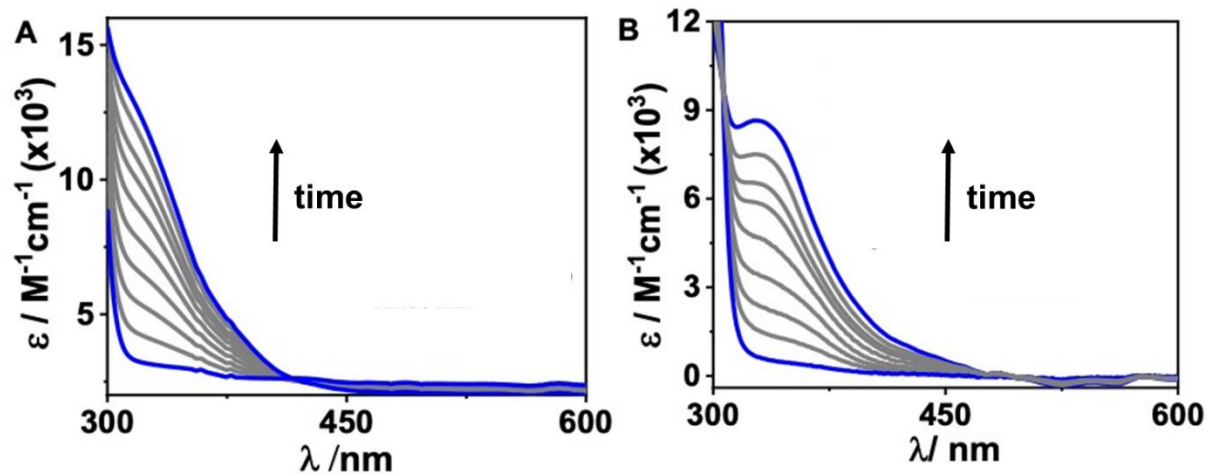

**Figure S4.** Kinetic UV-vis experiments showing spectral changes observed by addition of 12.5 mM H<sub>2</sub>O<sub>2</sub> (final concentration) to 0.125 mM [3SCC-Cu(I9HW28Q)<sub>3</sub>]<sup>2+</sup> (A) and [3SCC-Cu(I9HW28Q)<sub>3</sub>]<sup>+</sup> (B) in 100 mM HEPES pH 7.5.

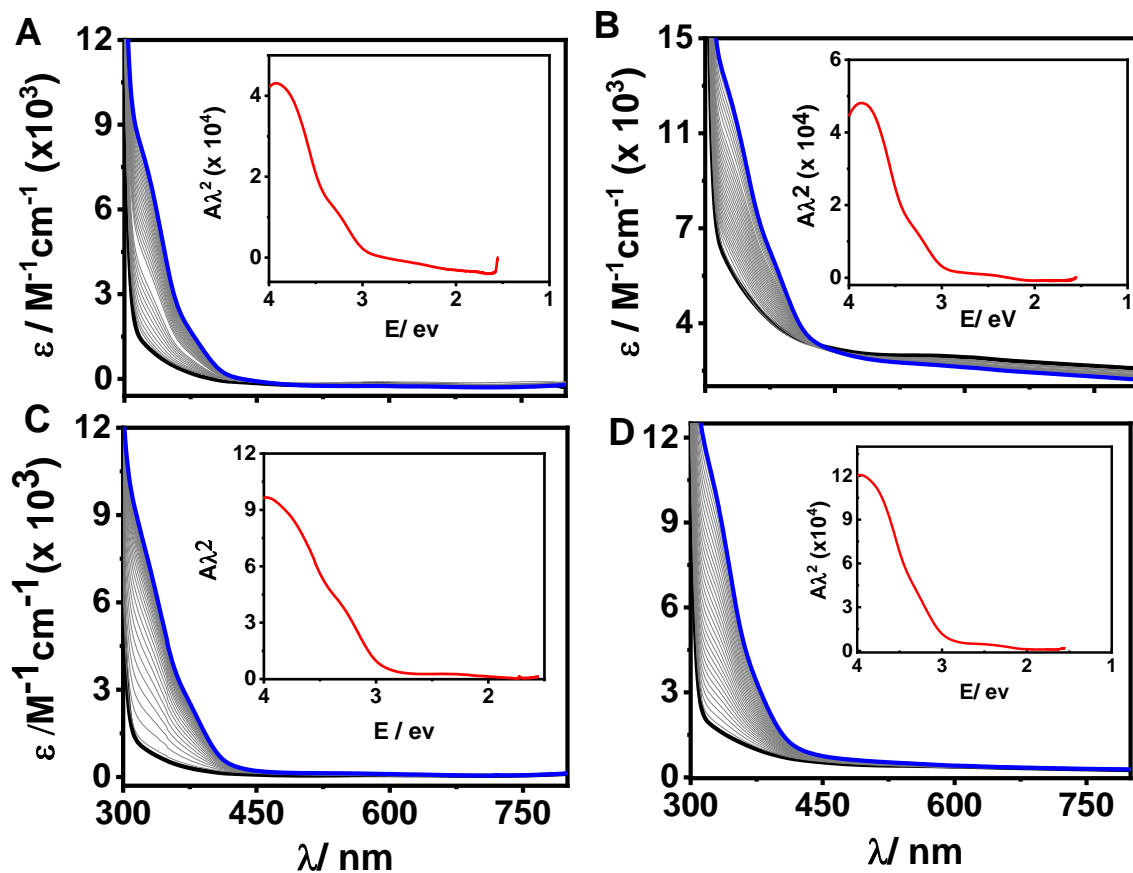

**Figure S5.** Kinetic UV-vis experiments showing spectral changes observed by addition of 12.5 mM  $\text{H}_2\text{O}_2$  (final concentration) to 0.125 mM  $[\text{3SCC-Cu}(\text{I9H})_3]^{2+}$  in pH 5.5 (A), 6.5 (B), 8.5 (C), and 9.5 (D) in mixed buffers. The initial traces prior to  $\text{H}_2\text{O}_2$  addition are in black and the final traces after  $\sim 2$  h of  $\text{H}_2\text{O}_2$  reaction are in blue. The insets show the corresponding energy plots of the final species after  $\text{H}_2\text{O}_2$  reaction.

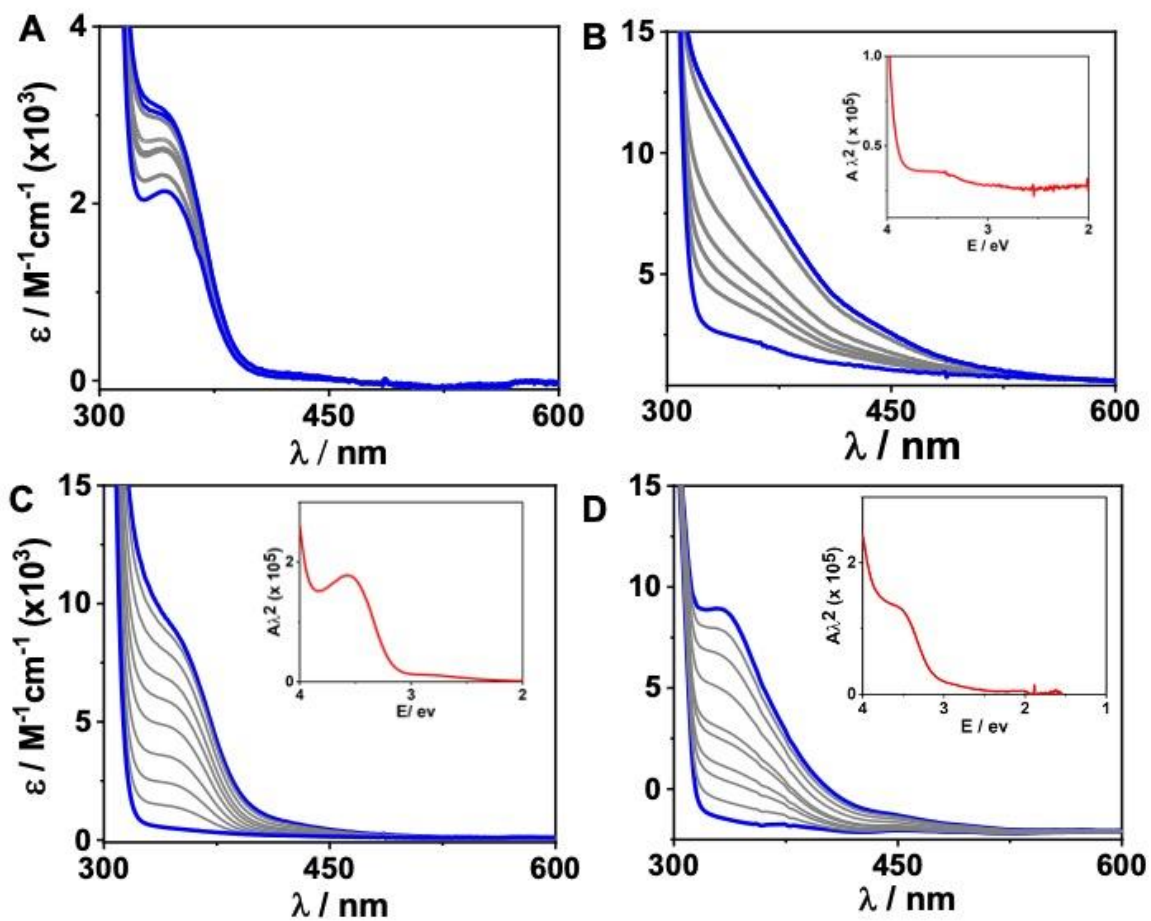

**Figure S6.** Corresponding experiments similar to Figure S5 but with the Cu(I)-peptide. Experiments are performed under anaerobic conditions to avoid  $\text{O}_2$  competition. The insets show the energy plots of the final species after  $\text{H}_2\text{O}_2$  reaction.

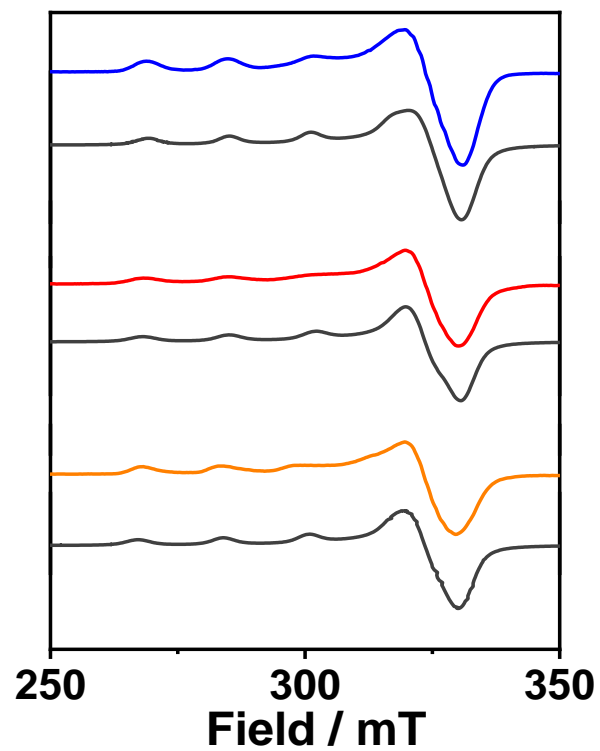

**Figure S7.** X-band EPR spectra of 0.5 mM  $[3\text{SCC-Cu(I9HW28Q)}_3]^{2+}$  (blue), in the presence of 100-fold  $\text{H}_2\text{O}_2$  (red), and the corresponding Cu(I)-peptide plus  $\text{H}_2\text{O}_2$  (orange) in 100 mM HEPES pH 7.5. Gray traces are the simulated spectra. All data were collected at 126 K.

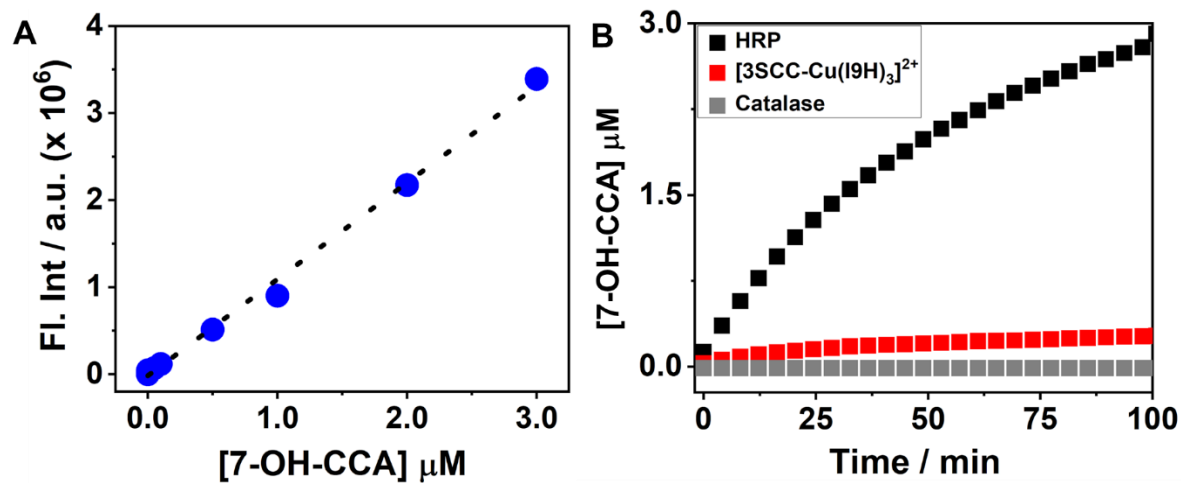

**Figure S8.** A) Calibration curve for 7-OH-CCA. B) Production of [OH<sup>•</sup>] measured by 3-CCA assay with HRP, catalase, and [3SCC-Cu(I9H)<sub>3</sub>]<sup>2+</sup>. Samples contained 0.25 mM proteins, 5 mM 3-CCA, and 25 mM H<sub>2</sub>O<sub>2</sub> in 100 mM HEPES pH 7.5. The concentration of 7-OH-CCA in B was calculated from the calibration curve.

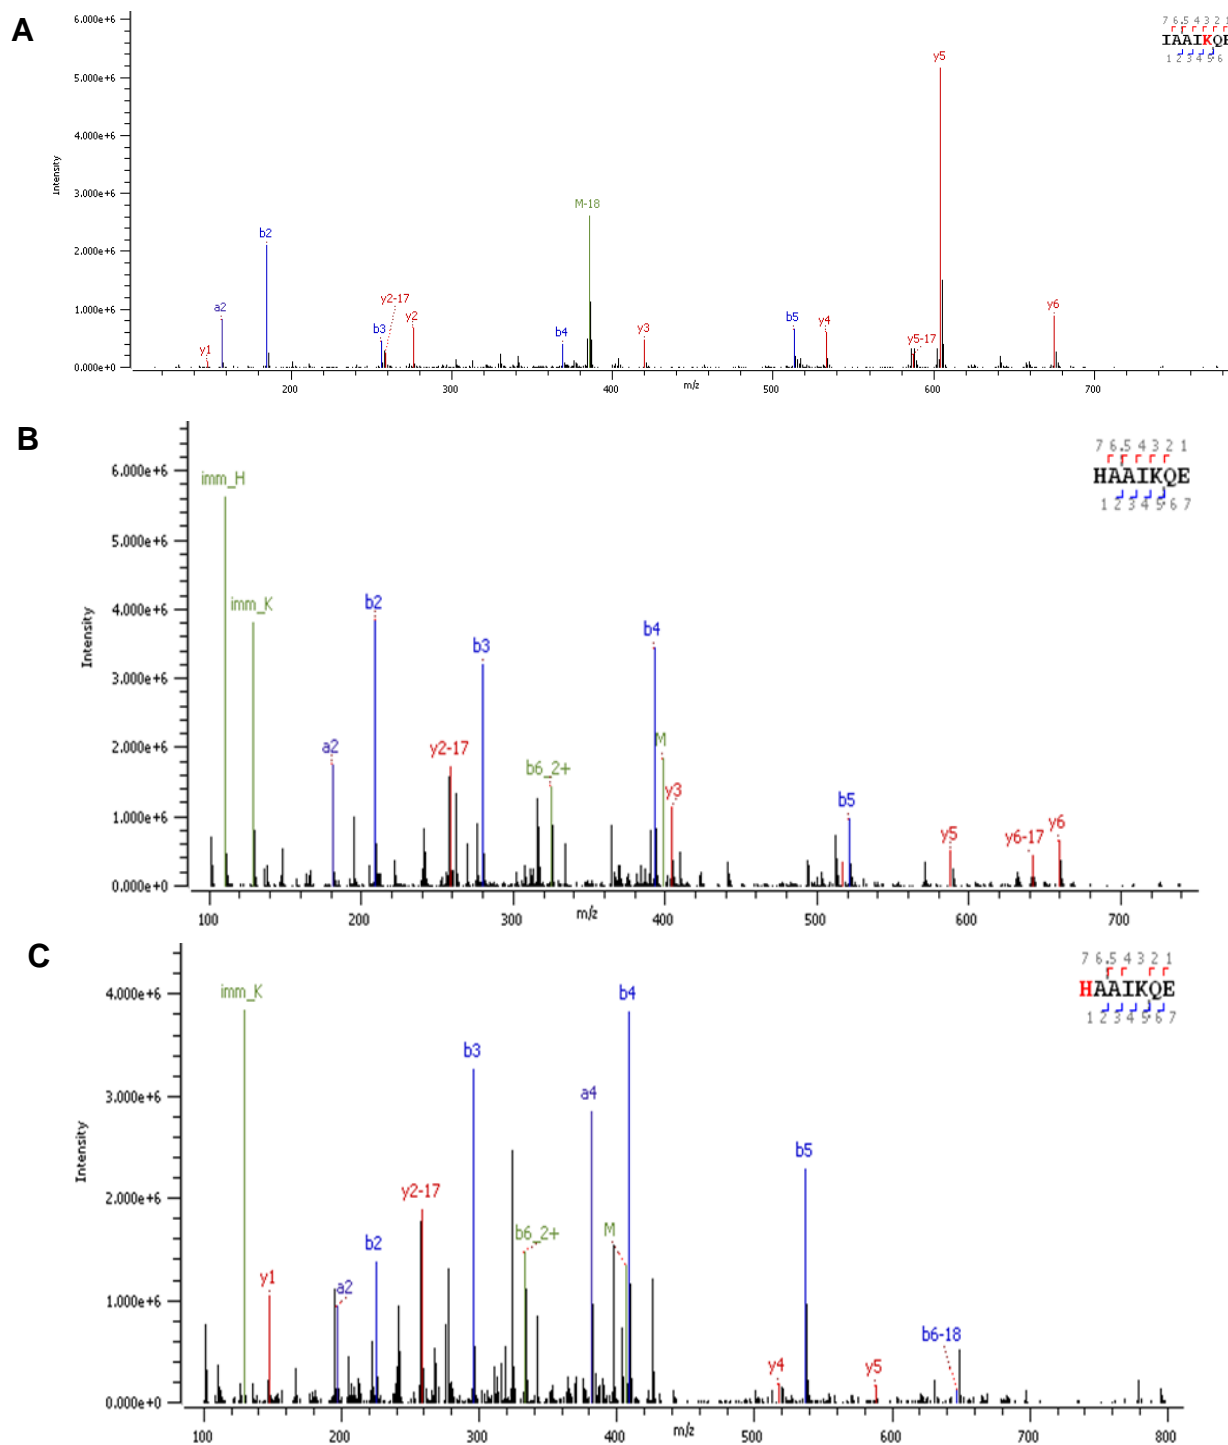

**Figure S9.** Representative MS/MS spectra of the  $[M+2H]^{2+}$  peptide fragment IAAIKQE (A). The HAAIKQE fragments in  $[3\text{SCC-Cu}(\text{I9H})_3]^{2+} + \text{H}_2\text{O}_2$  (B), and  $[3\text{SCC-Cu}(\text{I9H})_3]^+ + \text{H}_2\text{O}_2$  (C) samples are shown. The *b* and *y* ion series place the oxidation at K5 in (A), and show that His9 is not oxidized in the Cu(II)-peptide (B), while in (C) oxidation of His9 is observed in the Cu(I)-form of the peptide.

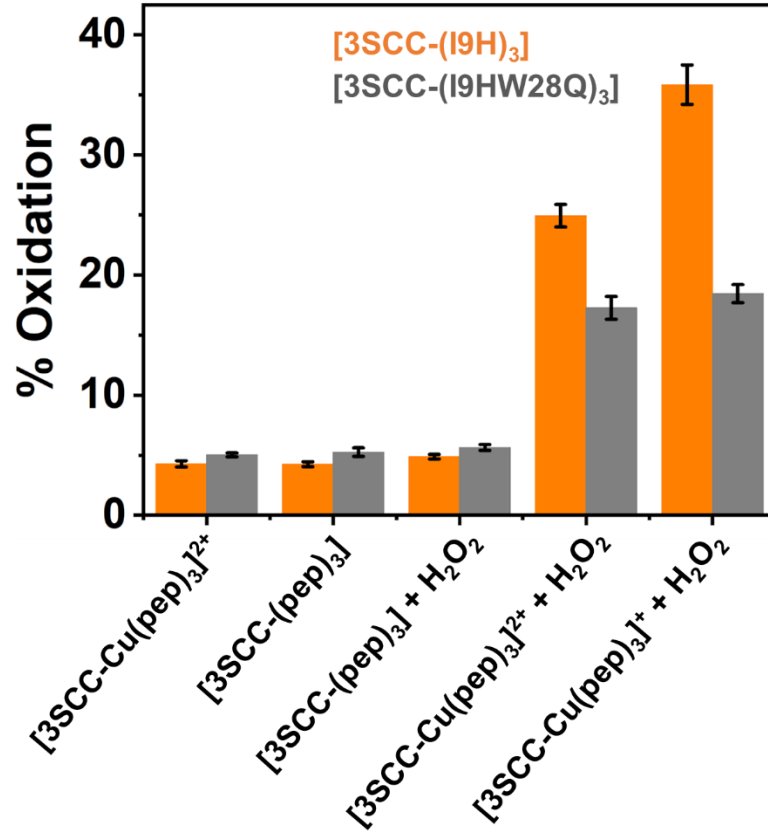

**Figure S10.** Percent oxidation of the ArCuP (orange bars) and the Trp28Gln mutant (gray bars) under various conditions as investigated by LC-MS/MS. Replacement of Trp28 with Gln results in the decreased oxidation of the peptide. Error bars are from 3 independent sample sets.

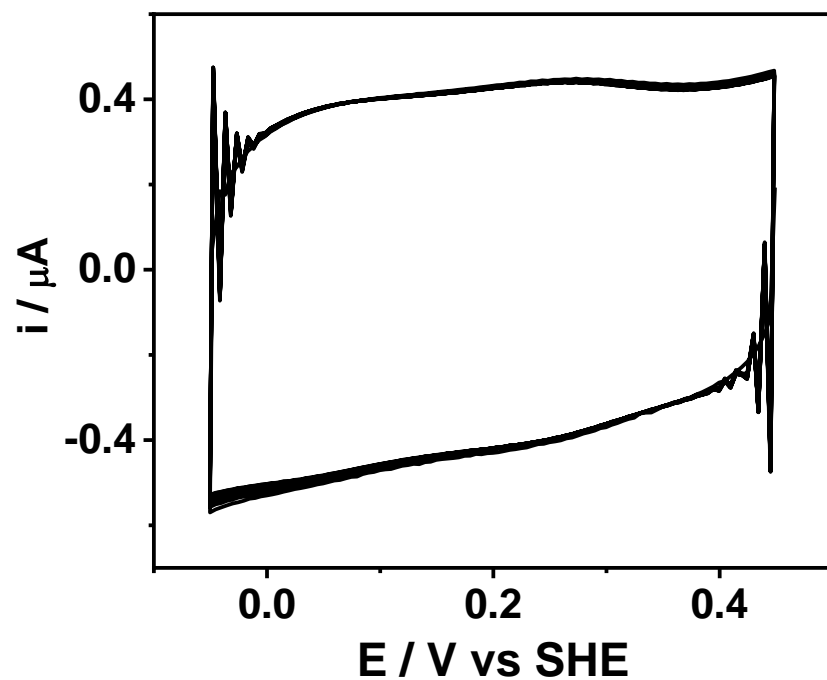

**Figure S11.** Voltammograms of the ArCuP showing film stability on PGE. Overlay of 30 scans at 20  $\text{mVs}^{-1}$  in 80 mM mixed buffer pH 6.5.



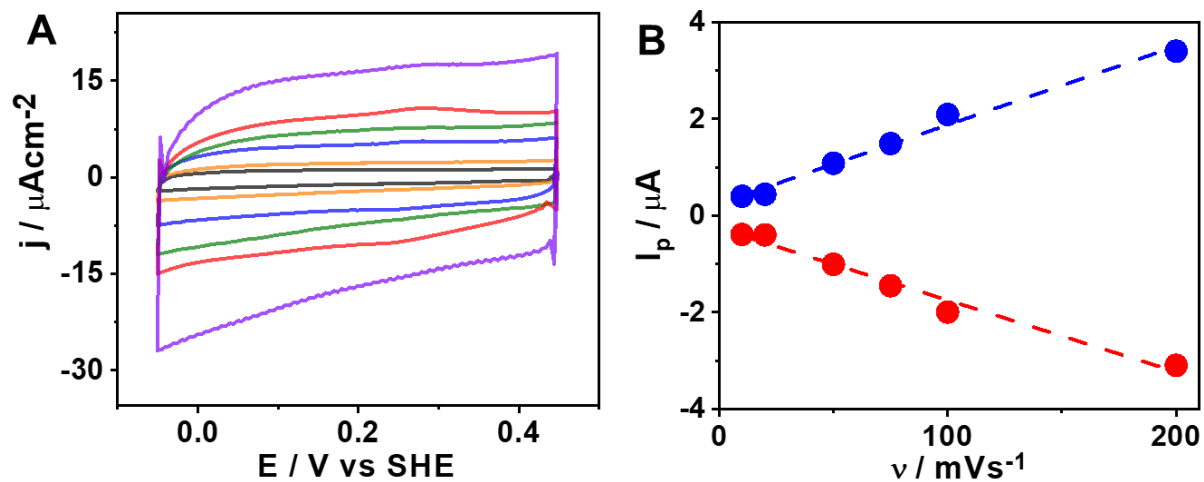

**Figure S12.** CVs of the ArCuP at  $v = 10$  (gray), 20 (orange), 50 (blue), 75 (green), 100 (red), and 200 (violet)  $\text{mVs}^{-1}$  in 80 mM mixed buffer pH 6.5 (A). The corresponding plot of peak current vs  $v$ .

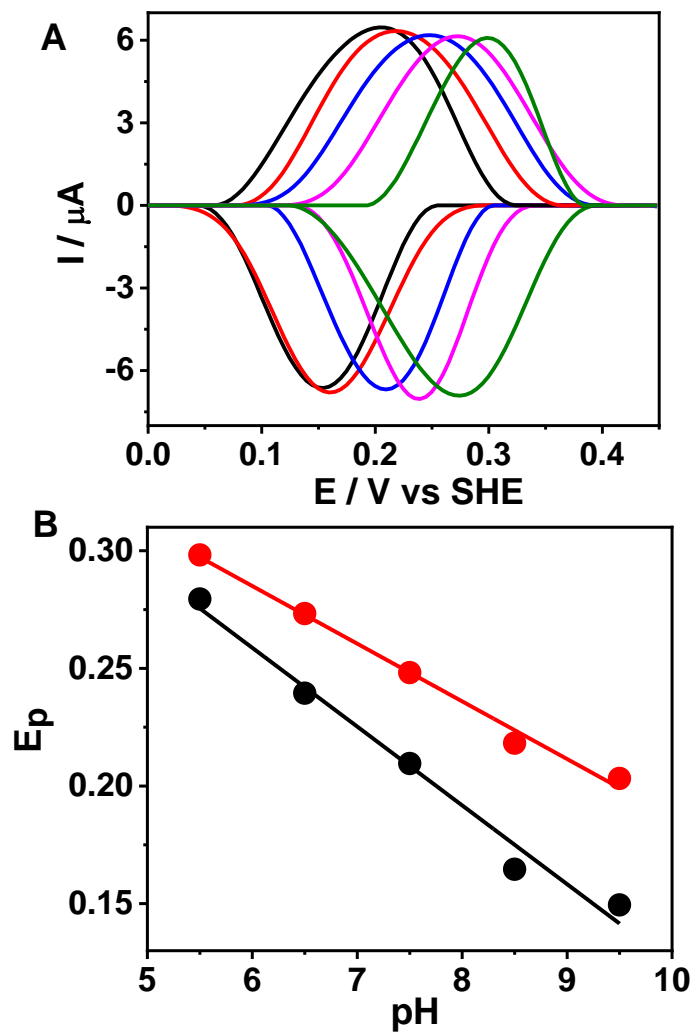

**Figure S13.** A) Background-subtracted CV scans at pH 5.5 (olive), 6.5 (magenta), 7.5 (blue), 8.5 (red), and 9.5 (black) at  $50 \text{ mV s}^{-1}$  in 80 mM mixed buffers. B) Plots of anodic (black) and cathodic (red) peak potentials vs pH.

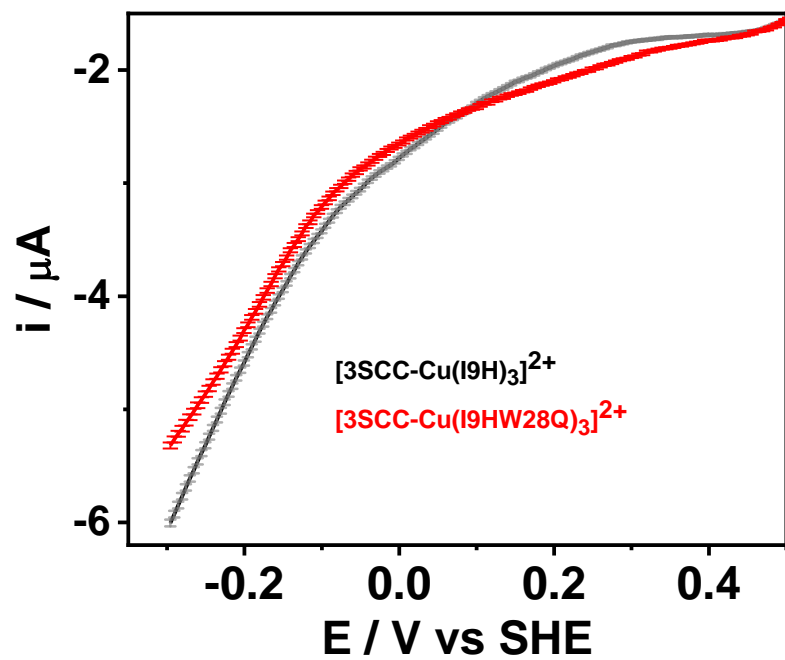

**Fig. S14.** LSV scans of  $[\text{3SCC-Cu(I9H)}_3]^{2+}$  (black) and  $[\text{3SCC-Cu(I9HW28Q)}_3]^{2+}$  (red) films on PGE in the presence of 1 mM  $\text{H}_2\text{O}_2$  in  $\text{N}_2$ -saturated 80 mM mixed buffer at pH 7.5.

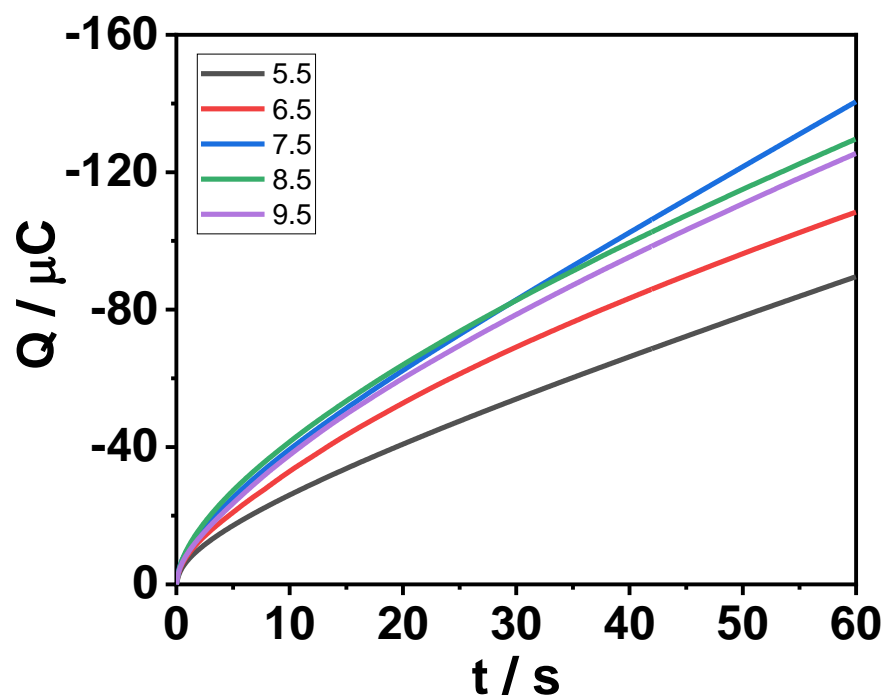

**Figure S15.** Chronoamperograms of ArCuP films at -0.3V vs SHE at pH 5.5 (gray), 6.5 (red), 7.5 (blue), 8.5 (green), and 9.5 (purple) in 80 mM mixed buffer.

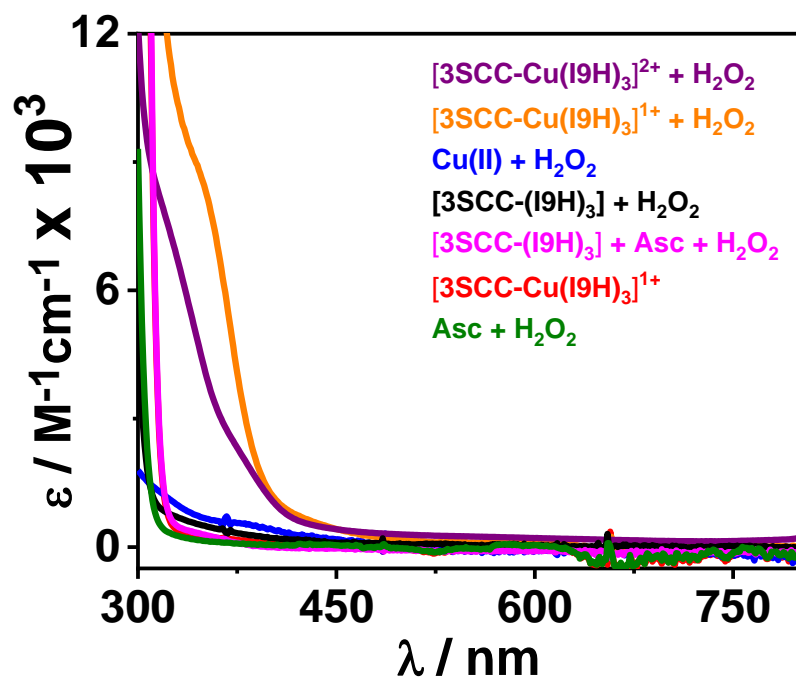

**Figure S16.** UV-Vis spectra of 0.125 mM  $[\text{3SCC-Cu(I9H)}_3]^{2+} + 12.5 \text{ mM H}_2\text{O}_2$  (purple); 0.125 mM  $[\text{3SCC-Cu(I9H)}_3]^+ + 12.5 \text{ mM H}_2\text{O}_2$  (orange); free  $\text{Cu(II)} + \text{H}_2\text{O}_2$  without the peptide (blue); apo peptide +  $\text{H}_2\text{O}_2$  (black); apo peptide +  $\text{H}_2\text{O}_2 + \text{Asc}$  (magenta);  $[\text{3SCC-Cu(I9H)}_3]^+$  only (red); and  $\text{Asc} + \text{H}_2\text{O}_2$  (green). All data were collected in 100 mM HEPES pH 7.4.

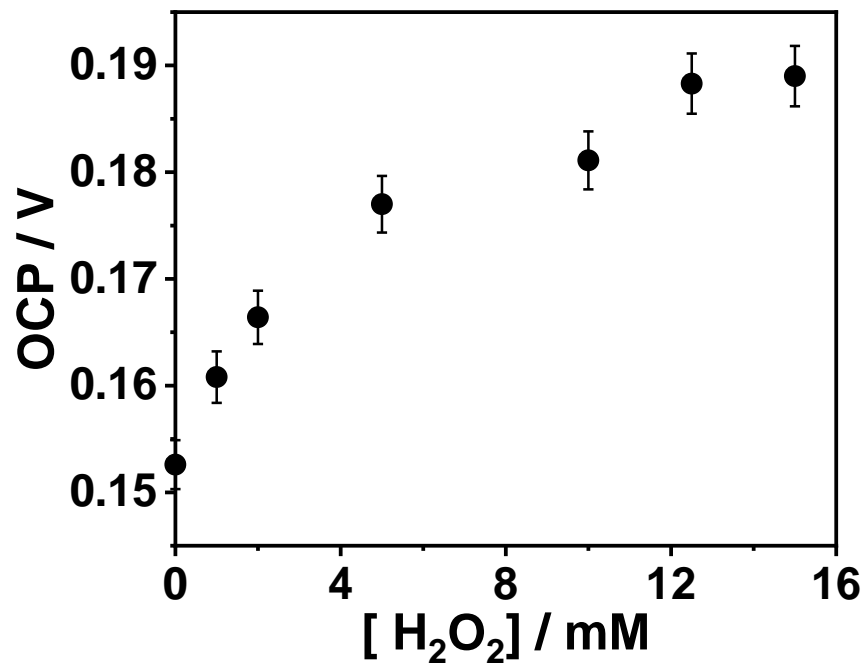

**Figure S17.** Comparison of OCP values as a function of  $\text{H}_2\text{O}_2$  concentration at pH 7.5 in 80 mM mixed buffer.

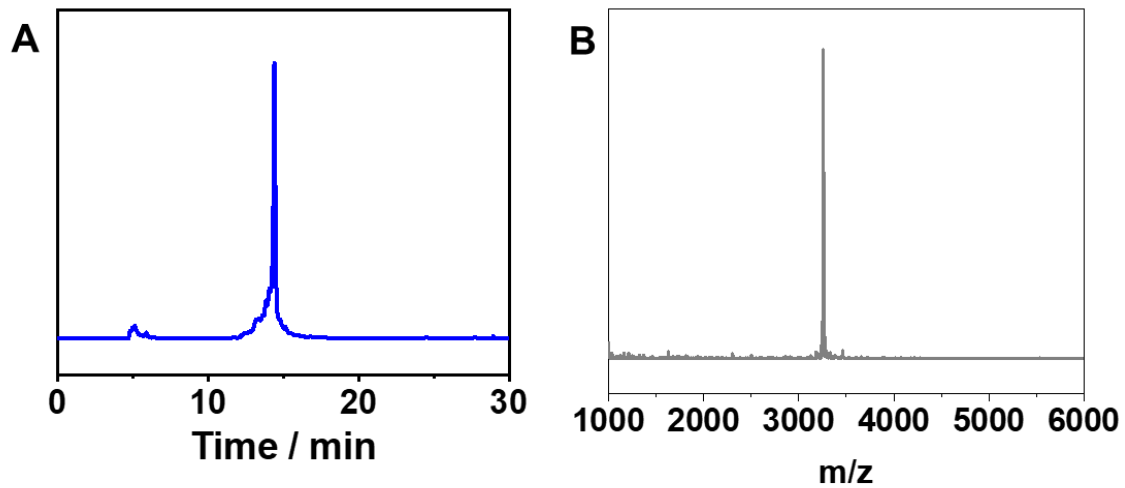

**Figure S18.** HPLC chromatogram (A) and MALDI-MS (B) spectrum of apo peptide during purification.
